# Supplementary material for: SUN4 is a spermatid type II inner nuclear membrane protein that forms heteromeric assemblies with SUN3 and interacts with lamin B3
Source: PubMed Central journal article supplement (PMC10112980; doi:10.1242/jcs.260155), 2023-03-27
Supplement: joces-136-260155-s1.pdf [file joces-136-260155-s1.pdf]

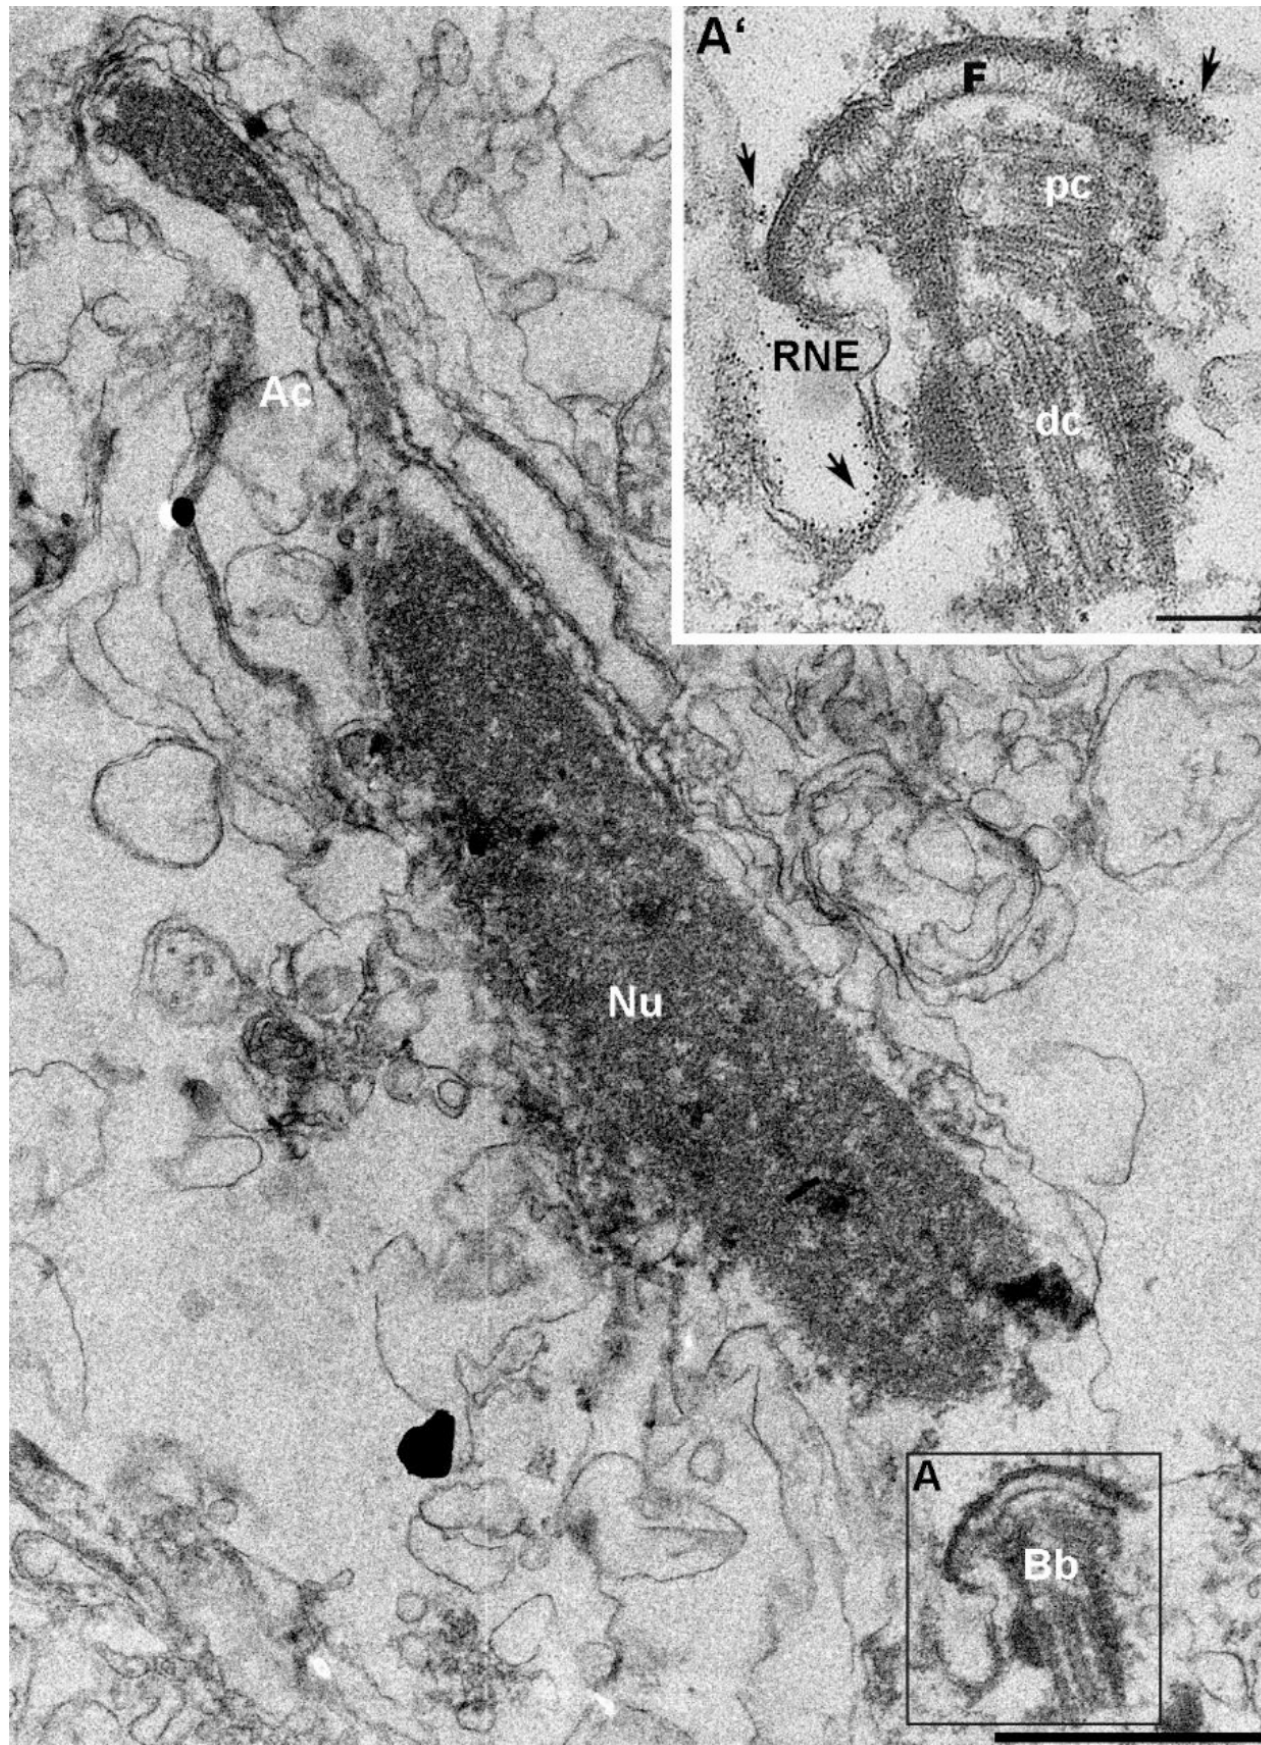

**Fig. S1. The SUN4 N-terminal domain is localized at the RNE of elongating spermatids.**

Representative electron micrographs of elongating spermatids in native mouse testis cryo-sections with immunogold-labelling (6 nm colloidal gold) of the SUN4 NTD. Area A is enlarged in A'. Gold particles (arrows) are mainly localized along the inner membrane of the redundant nuclear envelope and to both sides of the fossa region, but not directly within the implantation fossa (A'). Scale bars: 1  $\mu$ m (A) and 200 nm (A'). Bb, basal body; Nu, nucleoplasm; Ac, acrosome; F, implantation fossa; RNE, redundant nuclear envelope, dc, distal centriole; pc, proximal centriole. Image is re-presentative of two experimental repeats.

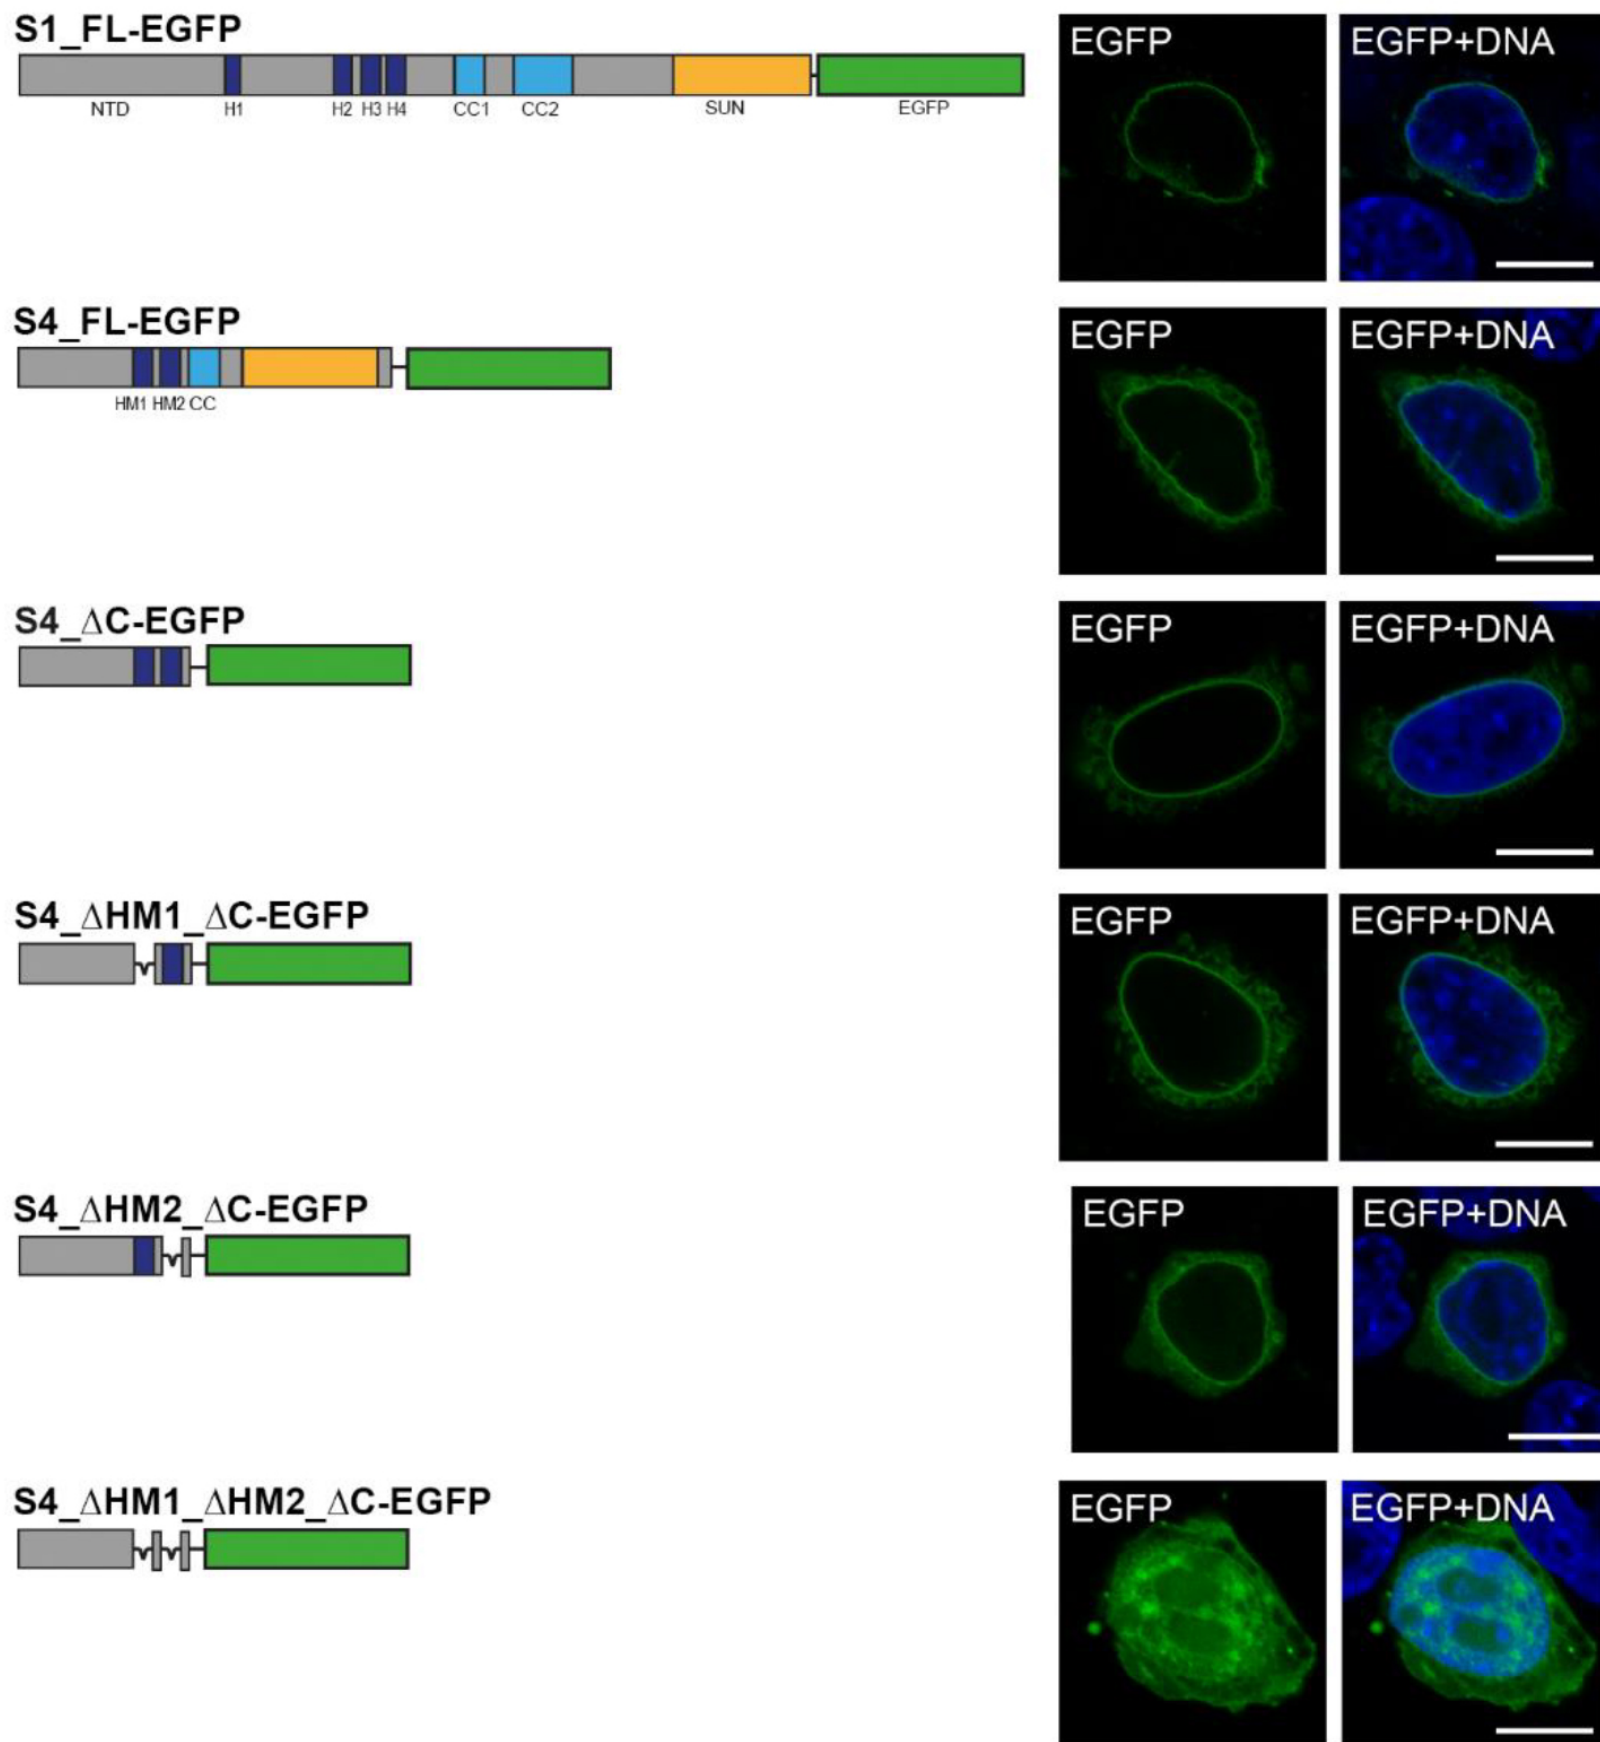

**Fig. S2. Subcellular localization of EGFP-tagged SUN1 and SUN4 reporter constructs used for FRAP analysis.** EGFP-tagged full-length SUN1 and SUN4, as well as SUN4 constructs with deletion of the C-terminal coiled-coil and SUN domain were transiently transfected into NIH 3T3 cells. Confocal microscopy was used to monitor their expression patterns 48 h after transfection via their EGFP-tag. For each construct, a fluorescence image of one representative cell is shown. DNA was counterstained with Hoechst. Scale bars: 10  $\mu$ m. Images are representative for at least five independent transfection experiments.

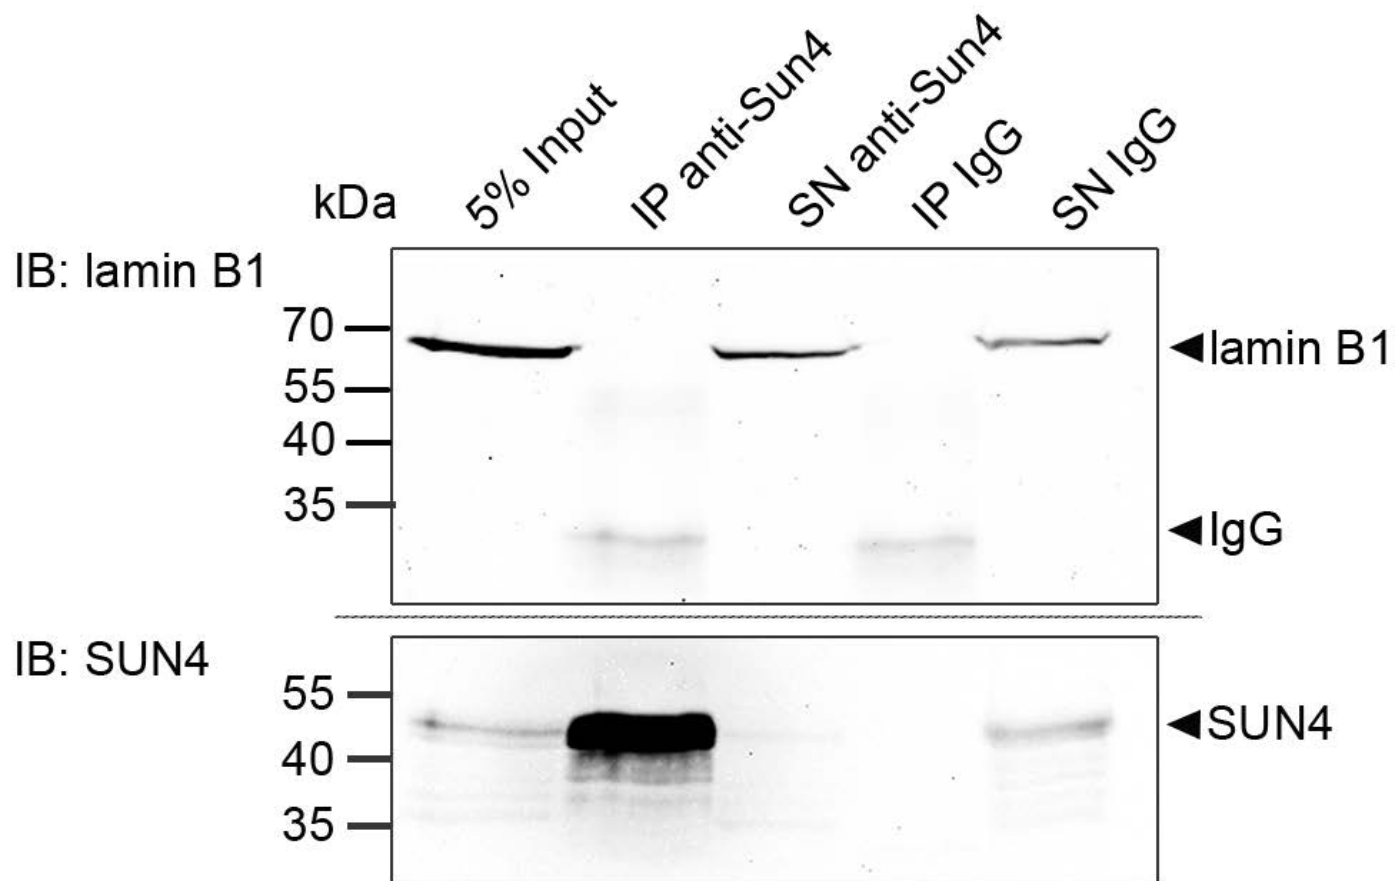

**Fig. S3. SUN4 does not appear to bind to lamin B1 *in vivo*.** Mouse testicular suspension cells were lysed in RIPA buffer and subjected to co-immunoprecipitation with guinea pig anti-SUN4 NTD antibody and unspecific guinea pig IgG as a negative control. The precipitates (IP) and supernatants containing unbound proteins (SN) were analyzed by immunoblotting (IB) using a rabbit anti-lamin B1 antibody. The SUN4 control presented here is identical to that in Fig. 7, as SUN4-lamin B1 interaction was analysed on the same co-IP samples used to test for SUN4-lamin B3 interaction. It is just shown here again for better visual comparison. Untreated testis cells served as input control. Amounts of loaded cell equivalents: 5% Input= $2 \times 10^6$ ; IP= $4 \times 10^7$ ; SN= $5 \times 10^6$ . Blot shown is representative for three experimental repeats.

### Figure 6A

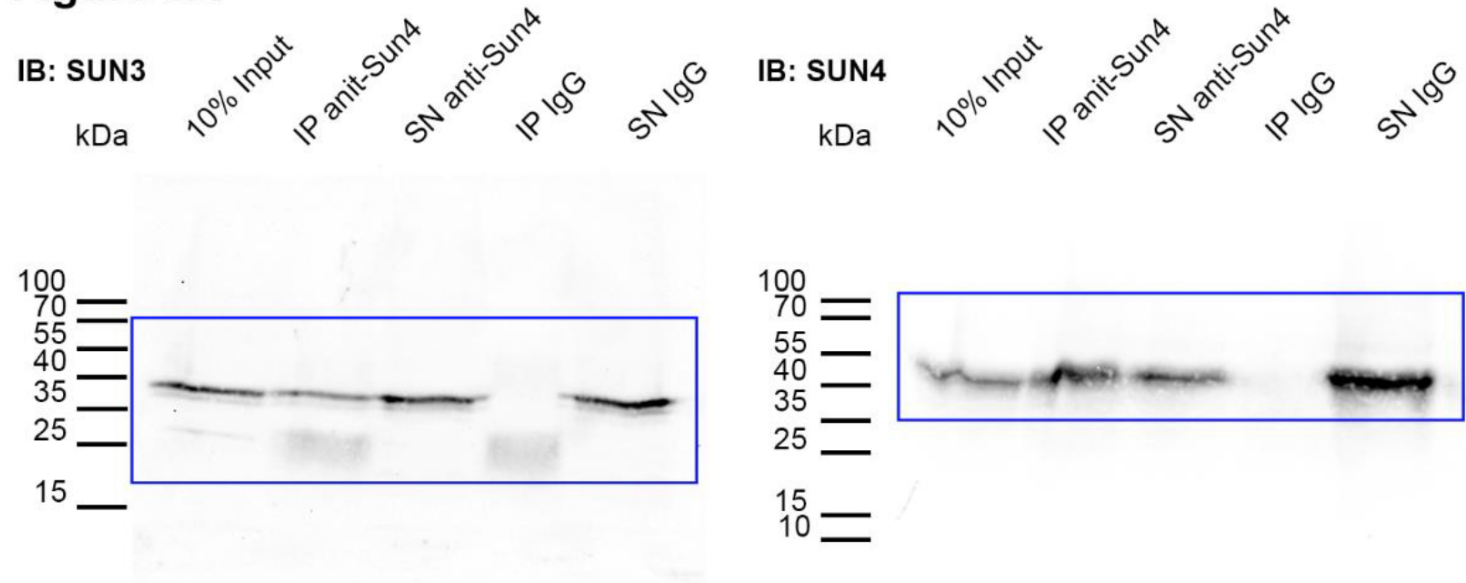

### Figure 6B

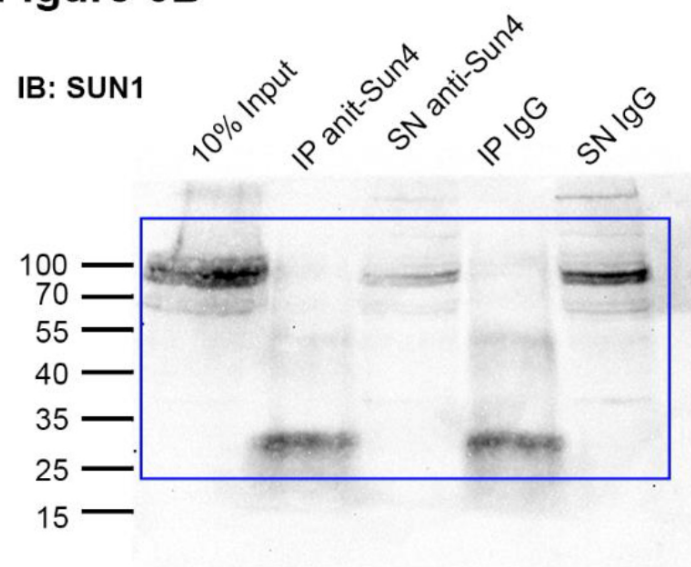

### Figure 6C

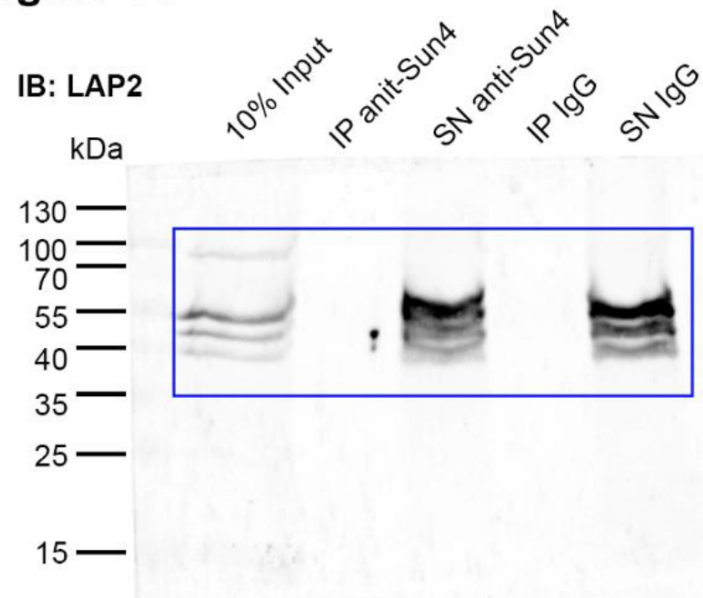

### Figure 6D

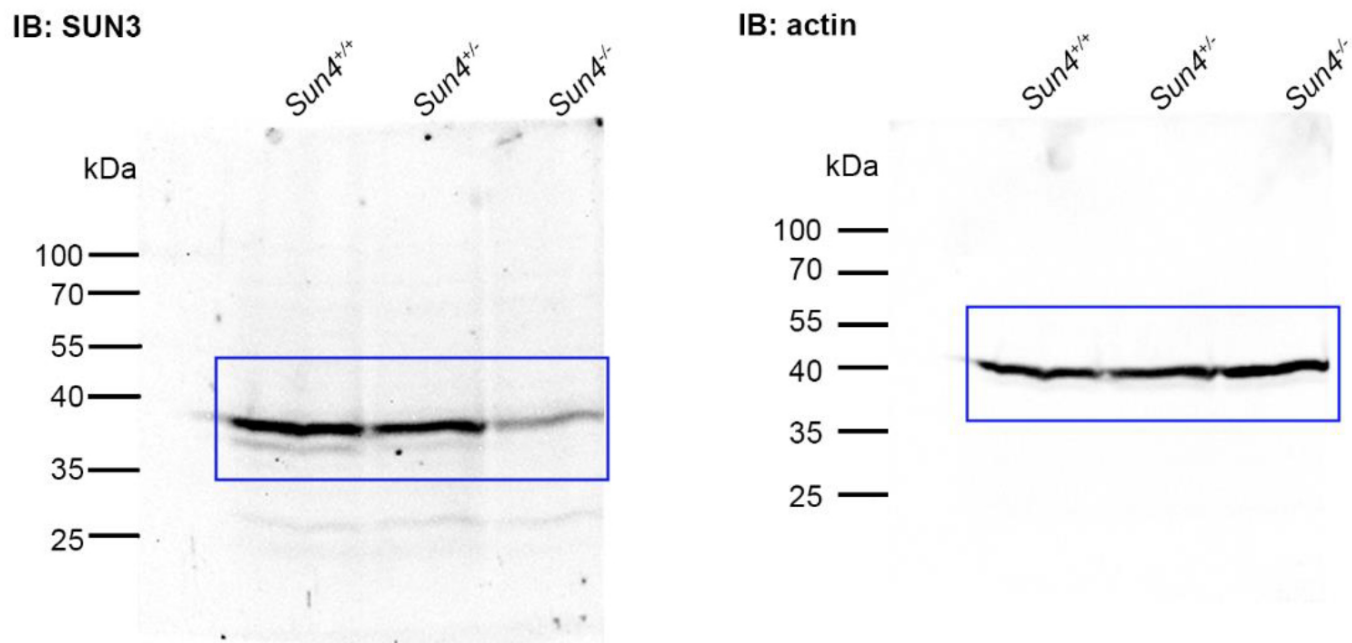

Fig. S4. Blot transparency (continued on the next page)

### Figure 7

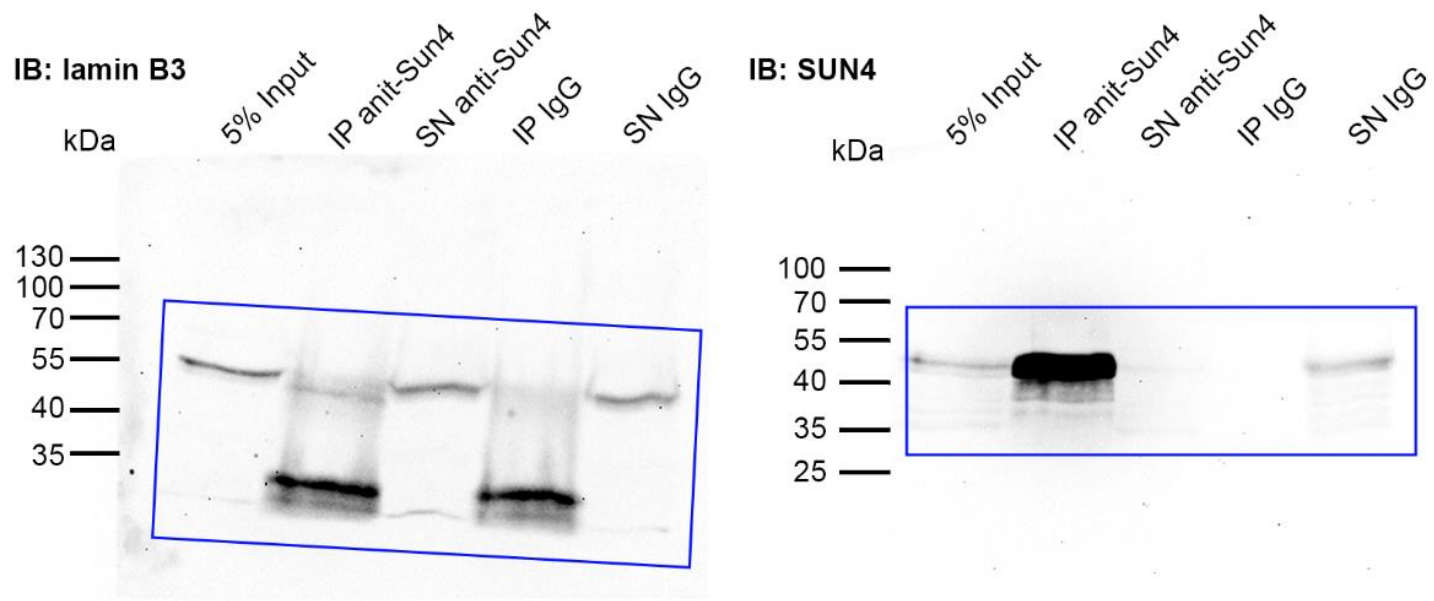

### Figure S3

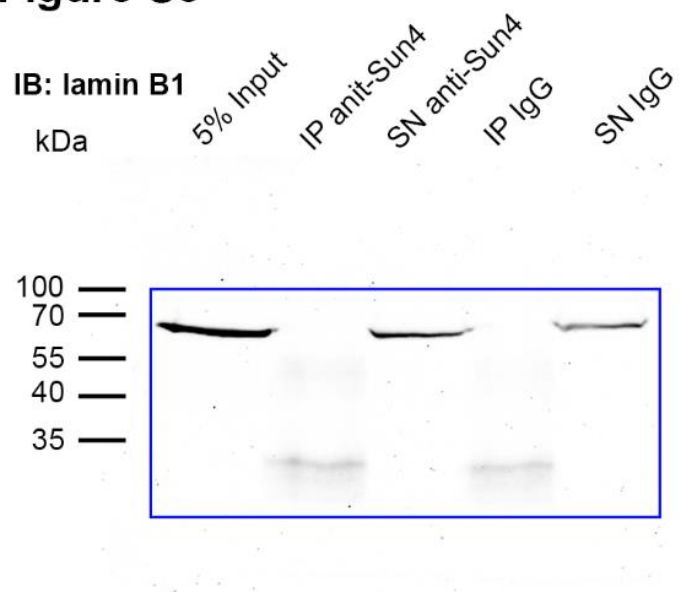

**Fig. S4. Blot transparency.** Full, uncropped images of all cropped (blue rectangles) Western Blots presented in this study. Reference figure numbers are indicated above the images.

**Table S1. Details on statistical analysis of FRAP experiments (Output of GraphPad Prism multiple comparisons analysis)**

**Ordinary one-way Anova of t50%-values - Multiple Comparisons**

Number of families 1  
 Number of comparisons per family 3  
 Alpha 0.05

| <b>Tukey's multiple comparisons test</b> |       | Mean Diff.      | 95.00% CI of diff. | Below threshold? | Summary     | <b>Adjusted P Value</b> |       |    |    |
|------------------------------------------|-------|-----------------|--------------------|------------------|-------------|-------------------------|-------|----|----|
| S4_ΔC-EGFP vs. S4_ΔHM1_ΔC-EGFP           | 2.745 | 0.8906 to 4.99  | Yes                | **               | 0.0024      |                         |       |    |    |
| S4_ΔC-EGFP vs. Sun4_ΔHM2_ΔC-EGFP         | 4.903 | 3.049 to 6.757  | Yes                | ****             | <0.0001     |                         |       |    |    |
| S4_ΔHM1_ΔC-EGFP vs. Sun4_ΔHM2_ΔC-EGFP    | 2.158 | 0.3042 to 4.013 | Yes                | *                | 0.0192      |                         |       |    |    |
| <b>Test details</b>                      |       | Mean 1          | Mean 2             | Mean Diff.       | SE of diff. | n1                      | n2    | q  | DF |
| S4_ΔC-EGFP vs. S4_ΔC_ΔHM1-EGFP           | 12.03 | 9.289           | 2.745              | 0.7632           | 15          | 15                      | 5.086 | 42 |    |
| S4_ΔC-EGFP vs. Sun4_ΔC_ΔHM2-EGFP         | 12.03 | 7.131           | 4.903              | 0.7632           | 15          | 15                      | 9.086 | 42 |    |
| S4_ΔC_ΔHM1-EGFP vs. Sun4_ΔC_ΔHM2-EGFP    | 9.289 | 7.131           | 2.158              | 0.7632           | 15          | 15                      | 4     | 42 |    |

**Ordinary one-way Anova of fluorescence intensities 30 s post-bleaching - Multiple Comparisons**

Number of families 1  
 Number of comparisons per family 6  
 Alpha 0.05

| <b>Tukey's multiple comparisons test</b> |          | Mean Diff.            | 95.00% CI of diff. | Below threshold? | Summary     | <b>Adjusted P Value</b> |        |    |    |
|------------------------------------------|----------|-----------------------|--------------------|------------------|-------------|-------------------------|--------|----|----|
| S4_ΔC-EGFP vs. S4_ΔHM1_ΔC-EGFP           | -0.0502  | -0.09558 to -0.004812 | Yes                | *                | 0.0247      |                         |        |    |    |
| S4_ΔC-EGFP vs. S4_ΔHM2_ΔC-EGFP           | -0.05253 | -0.09791 to -0.007142 | Yes                | *                | 0.0172      |                         |        |    |    |
| S4_ΔC-EGFP vs. S4_ΔHM1_ΔHM2_ΔC-EGFP      | -0.2849  | -0.3330 to -0.2367    | Yes                | ****             | <0.0001     |                         |        |    |    |
| S4_ΔHM1_ΔC-EGFP vs. S4_ΔHM2_ΔC-EGFP      | -0.00233 | -0.04771 to 0.04305   | No                 | ns               | 0.9991      |                         |        |    |    |
| S4_ΔHM1_ΔC-EGFP vs. S4_ΔHM1_ΔHM2_ΔC-EGFP | -0.2347  | -0.2828 to -0.1865    | Yes                | ****             | <0.0001     |                         |        |    |    |
| S4_ΔHM2_ΔC-EGFP vs. S4_ΔHM1_ΔHM2_ΔC-EGFP | -0.2323  | -0.2805 to -0.1842    | Yes                | ****             | <0.0001     |                         |        |    |    |
| <b>Test details</b>                      |          | Mean 1                | Mean 2             | Mean Diff.       | SE of diff. | n1                      | n2     | q  | DF |
| S4_ΔC-EGFP vs. S4_ΔHM1_ΔC-EGFP           | 0.686    | 0.7362                | -0.0502            | 0.01711          | 15          | 15                      | 4.149  | 53 |    |
| S4_ΔC-EGFP vs. S4_ΔHM2_ΔC-EGFP           | 0.686    | 0.7385                | -0.05253           | 0.01711          | 15          | 15                      | 4.341  | 53 |    |
| S4_ΔC-EGFP vs. S4_ΔHM1_ΔHM2_ΔC-EGFP      | 0.686    | 0.9708                | -0.2849            | 0.01815          | 15          | 12                      | 22.2   | 53 |    |
| S4_ΔHM1_ΔC-EGFP vs. S4_ΔHM2_ΔC-EGFP      | 0.7362   | 0.7385                | -0.00233           | 0.01711          | 15          | 15                      | 0.1926 | 53 |    |
| S4_ΔHM1_ΔC-EGFP vs. S4_ΔHM1_ΔHM2_ΔC-EGFP | 0.7362   | 0.9708                | -0.2347            | 0.01815          | 15          | 12                      | 18.29  | 53 |    |
| S4_ΔHM2_ΔC-EGFP vs. S4_ΔHM1_ΔHM2_ΔC-EGFP | 0.7385   | 0.9708                | -0.2323            | 0.01815          | 15          | 12                      | 18.1   | 53 |    |

Table S2. Oligonucleotides used in this study.

| Primer                | Sequence                         | Purpose                                                                                          |
|-----------------------|----------------------------------|--------------------------------------------------------------------------------------------------|
| Sun4_inc.ATG_5'       | 5'-AGGTCAGGATGCGGCGGA-3'         | 5' primer for amplification of <i>Sun4</i> and S4_ΔC cDNAs to create entry StrataClone construct |
| Sun4_SUNdom_3'_woStop | 5'-ATGGGGTCCCCCTGTGA-3'          | 3' primer for amplification of S4_FL cDNA to create StrataClone construct                        |
| Sun4_delC-term_3'     | 5'-CAGCATCTCCGTAGGTTTCGTT-3'     | 3' primer for amplification of S4_ΔC cDNA to create StrataClone construct                        |
| Sun4_delTM1_3'        | 5'-CCTCGGGGTAGGCATCTC-3'         | 3' primer for deletion of HM1                                                                    |
| Sun4_TM2_5'           | 5'-TGCAGGGAAATCTGCTCC-3'         | 5' primer for deletion of HM1                                                                    |
| Sun4_delTM2_3'        | 5'-GGAGCAGATTTCCCTGCA-3'         | 3' primer for deletion of HM2                                                                    |
| Sun4_cc_5'            | 5'-CCTTTGGAGAACGAACCTACG -3'     | 5' primer for deletion of HM2;<br>5' primer for <i>Sun4</i> RT-PCR expression analysis           |
| Muta_Myc-S4_5'        | 5'-CCGAATTCGCCCTCAGGTCAGGATGC-3' | 5' primer for site-directed mutagenesis to eliminate undesired TAG-codon                         |
| Muta_Myc-S4_3'        | 5'-GCATCCTGACCTGAGGGCGAATTCGG-3' | 3' primer for site-directed mutagenesis to eliminate TAG-codon                                   |
| Sun1_5'               | 5'-ATGGACTTTTCTCGGCTGCAC-3'      | 5' primer for amplification of <i>Sun1</i> coding sequence                                       |
| Sun1_3'_woStop        | 5'-CTGGATGGGCTCTCCGTG-3'         | 3' primer for amplification of <i>Sun1</i> coding sequence                                       |
| Sun3_RT_5'            | 5'-ACAGAGTTTCTCAAAAACCCAG-3'     | 5' primer for <i>Sun3</i> RT-PCR expression analysis                                             |
| Sun3_RT_3'            | 5'-AGCCAACTGTATTTGGTCCCCT-3'     | 3' primer for <i>Sun3</i> RT-PCR expression analysis                                             |
| Sun4_cc_3'            | 5'-GTCAGGTTTGCACGAAGT-3'         | 3' primer for <i>Sun4</i> RT-PCR expression analysis                                             |
| GAPDH5'               | 5'-GGGCCCACTTGAAGGGTGGAGC-3'     | 5' primer for <i>Gapdh</i> RT-PCR expression analysis                                            |
| GAPDH3'               | 5'-GTCAGATCCACGACGGACACATTGG-3'  | 3' primer for <i>Gapdh</i> RT-PCR expression analysis                                            |

**Table S3. Primary antibodies used in this study.** IF, immunofluorescence; EM, electron microscopy (immunogold labeling); IB, immunoblot; mAb, monoclonal antibody; pAb, polyclonal antibody.

| Antibody                | Manufacturer<br>(Catalogue<br>number/<br>Reference)        | Host                 | Working dilution                              |        |         |
|-------------------------|------------------------------------------------------------|----------------------|-----------------------------------------------|--------|---------|
|                         |                                                            |                      | IF                                            | EM     | IB      |
| <b>actin</b>            | Sigma-Aldrich<br>(A4700)                                   | Mouse<br>mAb         |                                               |        | 1:500   |
| <b>GFP (B-2)</b>        | Santa Cruz<br>Biotechnologies<br>(sc-9996)                 | Mouse<br>mAb         | 1:200                                         |        | 1:200   |
| <b>lamin A/C</b>        | Santa Cruz<br>(sc-20681)                                   | Rabbit<br>pAb        |                                               |        | 1:2,000 |
| <b>lamin B1</b>         | Sigma-Aldrich<br>(ZRB1143)                                 | Rabbit<br>mAb        | 1:100                                         |        | 1:5,000 |
| <b>lamin B3</b>         | Own synthesis<br>(Schütz et al., 2005)                     | Rabbit<br>pAb        | 1:100                                         |        |         |
| <b>13d4<br/>(LAP2)</b>  | Own synthesis<br>(Alzheimer et al.,<br>1998)               | Mouse<br>mAb         | Undiluted<br>hybridoma<br>cell<br>supernatant |        |         |
| <b>Myc</b>              | Thermo Fisher Scientific<br>(9E10)                         | Mouse<br>mAb         | 1:200                                         |        | 1:8,000 |
| <b>PDI RL90</b>         | Thermo Fisher Scientific<br>(MA3-019)                      | Mouse<br>mAb         | 1:200                                         |        | 1:1,000 |
| <b>SUN1</b>             | Own synthesis<br>(Göb et al., 2010)                        | Guinea<br>pig<br>pAb | 1:800                                         |        | 1:5,000 |
| <b>SUN3</b>             | Own synthesis<br>(Göb et al., 2010)                        | Guinea<br>pig<br>pAb | 1:1000                                        |        | 1:5,000 |
| <b>SUN4<br/>peptide</b> | Own synthesis<br>(Pasch et al., 2015)                      | Rabbit<br>pAb        |                                               |        | 1:5,000 |
| <b>SUN4-NTD</b>         | Own synthesis<br>(Pasch et al.,2015)                       | Guinea<br>pig<br>pAb | 1:2000                                        | 1:400  | 1:5,000 |
| <b>SUN4-NTD</b>         | Own synthesis<br>(Pasch et al.,2015)                       | Rabbit<br>pAb        |                                               | 1:2400 |         |
| <b>IgG</b>              | Jackson<br>ImmunoResearch<br>Laboratories<br>(011-000-003) | Rabbit<br>pAb        |                                               |        |         |
| <b>IgG</b>              | Jackson<br>ImmunoResearch<br>Laboratories<br>(006-000-003) | Guinea<br>pig<br>pAb |                                               |        |         |



**Table S4. Secondary antibodies used in this study.**

| <b>Antibody</b>        | <b>Manufacturer<br/>(catalogue number)</b>              | <b>Host</b> | <b>Antigen</b>                   | <b>Dilution</b> |
|------------------------|---------------------------------------------------------|-------------|----------------------------------|-----------------|
| <b>6nm Gold</b>        | Jackson ImmunoResearch<br>Laboratories<br>(706-195-148) | Donkey      | Guinea pig IgG                   | 1:10            |
| <b>6nm Gold</b>        | Jackson ImmunoResearch<br>Laboratories<br>(111-195-144) | Goat        | Rabbit IgG                       | 1:10            |
| <b>HRP</b>             | Jackson ImmunoResearch<br>Laboratories<br>(106-035-003) | Goat        | Guinea pig IgG                   | 1:10,000        |
| <b>HRP</b>             | Jackson ImmunoResearch<br>Laboratories<br>(706-035-148) | Donkey      | Guinea pig IgG<br>Cross-adsorbed | 1:10,000        |
| <b>HRP</b>             | Jackson ImmunoResearch<br>Laboratories<br>(111-035-003) | Goat        | Rabbit IgG                       | 1:10,000        |
| <b>HRP</b>             | Jackson ImmunoResearch<br>Laboratories<br>(711-035-152) | Donkey      | Rabbit IgG<br>Cross-adsorbed     | 1:25,000        |
| <b>HRP</b>             | Jackson ImmunoResearch<br>Laboratories<br>(115-035-003) | Goat        | Mouse IgG                        | 1:10,000        |
| <b>AlexaFluor™ 488</b> | Thermo Fisher Scientific<br>(A-11008)                   | Goat        | Rabbit IgG                       | 1:200           |
| <b>AlexaFluor™ 488</b> | Thermo Fisher Scientific<br>(A-10680)                   | Goat        | Mouse IgG                        | 1:300           |
| <b>Texas Red</b>       | Jackson ImmunoResearch<br>Laboratories<br>(115-075-044) | Goat        | Mouse IgG                        | 1:150           |
| <b>Texas Red</b>       | Jackson ImmunoResearch<br>Laboratories<br>(106-075-003) | Goat        | Guinea pig IgG                   | 1:50            |
